# Supplementary material for: Resuscitation Attempt and Outcomes in Patients With Asystole Out-of-Hospital Cardiac Arrest
Source: PubMed Central journal article supplement (PMC11574695; doi:10.1001/jamanetworkopen.2024.45543), 2024-11-18
Supplement: jamanetwopen-e2445543-s001.pdf [file jamanetwopen-e2445543-s001.pdf]

## Supplemental Online Content

Ishii J, Nishikimi M, Kikutani K, et al. Resuscitation attempt and outcomes among patients with asystole out-of-hospital cardiac arrest. *JAMA Netw Open*. 2024;7(11):e2445543. doi: 10.1001/jamanetworkopen.2024.45543

**eMethods.** Setting, Data Collection, Definition, Exposures, and Risk-Set Matching Analysis

**eTable 1.** Secular Trends in the Patient Outcomes at 30 Days

**eFigure 1.** Secular Trends in the Patient Outcomes at 90 Days

**eFigure 2.** Secular Trends in the Outcomes Among Patients With ROSC at Any Time

**eTable 2.** Secular Trends in the Performance of Prehospital and In-Hospital Advanced Life Support (ALS) Procedures in the Analyzed Patients

**eTable 3.** Characteristics of Patients With OHCA and an Initial Rhythm of Asystole Who Received Prehospital AAM and Were at Risk of Receiving AAM in the Time-Dependent Propensity Score-Matched Cohort

**eTable 4.** Characteristics of Patients With OHCA and an Initial Rhythm of Asystole Who Received Prehospital Epinephrine Administration and Were at Risk of Receiving Prehospital Epinephrine Administration in the Time-Dependent Propensity Score-Matched Cohort

**eTable 5.** Association Between Prehospital ALS Procedures and Patient Outcomes at 90 Days

**eTable 6.** Time Spent on CPR Procedures Until ROSC

**eReferences.**

27 This supplementary material has been provided by the authors to give readers  
28 additional information about their work.

29 **eMethods.** Setting, Data Collection, Definition, Exposures, and Risk-Set Matching  
30 Analysis

31

32 **JAAM-OHCA registry**

33 The JAAM-OHCA registry is a nationwide prospective registry of out-of-hospital cardiac arrest  
34 (OHCA) patients maintained by the Japanese Association of Acute Medicine (JAAM). The detailed  
35 methodology of the JAAM-OHCA registry is described in a previous report.<sup>1</sup> In brief, this registry consists of  
36 prehospital data collected using the Utstein-style template<sup>2,3</sup> and in-hospital data, including patient  
37 characteristics, resuscitation and intensive care procedures, and outcomes. The neurological status of the  
38 survivors was evaluated by the medical staff at each institution 1 month after the event. As quality control, if  
39 the data form of the JAAM-OHCA registry was incomplete, the JAAM-OHCA registry committee, composed  
40 of specialists in the fields of emergency medicine and epidemiology, returned it to the respective institution  
41 requesting that it be completed to the best extent possible, which resulted in no loss of follow-up to determine  
42 the outcomes at 30 days among the patients included in this study.

43

44 **Emergency medical service (EMS) system in Japan**

45 An ambulance carries three emergency providers and at least one emergency life-saving technician  
46 who is skilled at intravenous (IV) catheterization, IV epinephrine administration, and advanced airway  
47 management (AAM). EMS personnel do not place intraosseous access. Cardiopulmonary resuscitation (CPR)  
48 is conducted according to the Japanese guidelines, which are compliant with the international resuscitation  
49 guidelines.<sup>4</sup> Termination-of-resuscitation (TOR) can be implemented only when patients satisfy all of the  
50 following requirements: patients in a terminal state, patients who have provided advance directive (AD)  
51 against resuscitation attempts, patients' family members expressing their wish to withhold CPR, and  
52 physicians in charge directing the EMS personnel to terminate CPR in a direct communication. The EMS  
53 personnel can withhold CPR only for cases in which death is obvious, such as cases of decapitation,  
54 incineration, late postmortem changes (decomposition, mummification, etc) and early postmortem changes  
55 (rigor mortis, postmortem lividity, etc).<sup>5</sup>

56

57 **Data collection, definition, and exposures**

58 Characteristics of the patients, OHCA event, resuscitative procedures and outcomes were collected  
59 from the JAAM-OHCA registry. AAM, IV catheterization, and IV epinephrine administration were defined as  
60 the prehospital advanced life support (ALS) procedures. IV epinephrine administration, tracheal intubation,  
61 and targeted temperature management (TTM) were defined as in-hospital ALS procedures. The main  
62 exposure variables were year of OHCA and prehospital ALS procedures (AAM and IV epinephrine  
63 administration). Because of the collinearity between IV catheterization and IV epinephrine administration, we  
64 did not include IV catheterization as an exposure variable. In addition, we calculated the time spent on CPR  
65 procedures until return of spontaneous circulation (ROSC) was achieved in the prehospital and in-hospital  
66 settings as indices of medical resource consumption.

67

68 **Advanced life support termination-of-resuscitation (ALS-TOR) rule<sup>6</sup> and TOR in the in-hospital setting**

69 Regarding ALS-TOR rule, patients are regarded as candidates for TOR when all the following 5  
70 criteria are met: (1) event not witnessed by the EMS personnel; (2) no automated external defibrillator (AED)  
71 used or manual shock applied in the out-of-hospital setting; (3) no ROSC in the out-of-hospital setting; (4) no  
72 bystander witness of the arrest; (5) no bystander-administered CPR. As for in-hospital TOR, there are no  
73 established criteria in Japan.<sup>4</sup> The Japan Resuscitation Council Resuscitation guidelines 2020 suggest that  
74  $\text{EtCO}_2 \geq 10$  mmHg at 20 minutes after the initial measurement or initiation of resuscitation is a potential  
75 predictor of ROSC and survival at hospital discharge.<sup>4</sup> Therefore, physicians often judge whether to terminate  
76 or continue resuscitation efforts based on several predictive factors, including the  $\text{EtCO}_2$ , measured at a  
77 certain time (such as 20 minutes) after the initiation of resuscitation.

78

79 **Risk-set matching analysis with time-dependent propensity score (PS)**

80 PS indicating the time-varying probability of receiving the prehospital procedures was calculated  
81 by a competing risk time-to-event analysis using the Fine-Gray regression model.<sup>7-11</sup> In the model, time to  
82 receiving the procedures was the dependent variable, and arrival of the EMS personnel was set as time 0  
83 because the patients were at-risk of receiving the procedure only after this time-point. We fit two models: one  
84 with the dependent variable of time-to-AAM and the other with the dependent variable of time-to-IV

85 epinephrine administration. We included age, sex, witness status<sup>7,12</sup> (family, friend, colleague, passers-by,  
86 others, or no witness), bystander-initiated CPR, year of occurrence, day of occurrence (weekday or weekend),  
87 time of occurrence (daytime or nighttime), external etiology of the cardiac arrest, prehospital involvement of  
88 physician and time from the emergency call to arrival of the EMS personnel as the time-independent  
89 covariates. In the analysis, we did not include the data of patients who were not in cardiac arrest at the time of  
90 arrival of the EMS personnel (but subsequently suffered from cardiac arrest while being treated by the EMS  
91 personnel), because patients with a non-asystole rhythm as the first-documented rhythm were excluded from  
92 the study. The time-dependent covariates included the remaining prehospital procedures (AAM or IV  
93 epinephrine administration) and shock delivery by the EMS personnel.

94 We performed 1:1 risk-set matching with replacement of each of the prehospital procedures using the  
95 calculated time-dependent PS.<sup>13,14</sup> A patient who underwent the prehospital procedures at any given minute  
96 after arrival of the EMS personnel was sequentially matched with a patient who was likely to have received  
97 prehospital procedures and had a similar PS in the same minute. These at-risk patients could have  
98 subsequently undergone the prehospital procedures after the matching or never undergone prehospital  
99 procedures, because the matching should be independent of future events.<sup>13,14</sup> At-risk patients could have been  
100 matched multiple times as at-risk patients or patients undergoing the prehospital procedures (only if the  
101 patients underwent the prehospital procedures) until undergoing the prehospital procedures (matching with  
102 replacement).<sup>15</sup> We set the caliper width for the nearest neighbor matching at 0.2 SD of the PS in the logit  
103 scale.<sup>16</sup> To assess the performance of the risk-set matching, we calculated a standardized difference for each  
104 covariate. A standardized difference of less than 0.25 was regarded as a well-balanced match.<sup>15</sup> We created  
105 two PS-matched cohorts: one for AAM and the other for IV epinephrine administration. In each of the  
106 matched cohorts, we fitted a conditional logistic model with matched pairs to calculate the odds ratios (ORs)  
107 with 95% confidence intervals (CIs).<sup>17</sup> The ORs represented the estimated magnitude of the association of the  
108 prehospital procedures with the outcomes as compared with that of those at risk of undergoing prehospital  
109 procedures.

110 **eTable 1.** Secular Trends in the Patient Outcomes at 30 days

111 A All Patients Included in Analysis

|          | No. (%) of patients (n = 35 843) |                 |                 |                 |                 |                 |                 | P value | Total (n = 35 843) |
|----------|----------------------------------|-----------------|-----------------|-----------------|-----------------|-----------------|-----------------|---------|--------------------|
|          | 2014 (n = 1848)                  | 2015 (n = 4984) | 2016 (n = 5513) | 2017 (n = 5706) | 2018 (n = 5999) | 2019 (n = 5901) | 2020 (n = 5892) |         |                    |
| CPC ≤2   | 2 (0.1)                          | 9 (0.2)         | 9 (0.2)         | 12 (0.2)        | 15 (0.3)        | 9 (0.2)         | 11 (0.2)        | .69     | 67 (0.2)           |
| CPC ≤3   | 5 (0.3)                          | 23 (0.5)        | 21 (0.4)        | 27 (0.5)        | 30 (0.5)        | 38 (0.6)        | 28 (0.5)        | .11     | 172 (0.5)          |
| Survival | 30 (1.6)                         | 68 (1.4)        | 87 (1.6)        | 76 (1.3)        | 79 (1.3)        | 84 (1.4)        | 73 (1.2)        | .24     | 497 (1.4)          |
| ROSC     | 424 (22.9)                       | 1122 (22.5)     | 1274 (23.1)     | 1314 (23.0)     | 1349 (22.5)     | 1360 (23.0)     | 1178 (20.0)     | .003    | 8021 (22.4)        |

112

113 B Patients Older Than 80 years

|          | No. (%) of patients (n = 14 453) |                 |                 |                 |                 |                 |                 | P value | Total (n = 14 453) |
|----------|----------------------------------|-----------------|-----------------|-----------------|-----------------|-----------------|-----------------|---------|--------------------|
|          | 2014 (n = 693)                   | 2015 (n = 1919) | 2016 (n = 2159) | 2017 (n = 2347) | 2018 (n = 2444) | 2019 (n = 2446) | 2020 (n = 2445) |         |                    |
| CPC ≤2   | 0 (0)                            | 3 (0.2)         | 0 (0)           | 3 (0.1)         | 2 (0.1)         | 1 (0.04)        | 3 (0.1)         | .81     | 12 (0.1)           |
| CPC ≤3   | 1 (0.1)                          | 5 (0.3)         | 5 (0.2)         | 9 (0.4)         | 7 (0.3)         | 13 (0.5)        | 10 (0.4)        | .08     | 50 (0.3)           |
| Survival | 9 (1.3)                          | 25 (1.3)        | 27 (1.3)        | 20 (0.9)        | 19 (0.8)        | 30 (1.2)        | 28 (1.1)        | .56     | 158 (1.1)          |
| ROSC     | 174 (25.1)                       | 452 (23.6)      | 517 (23.9)      | 533 (22.7)      | 576 (23.6)      | 596 (24.4)      | 520 (21.3)      | .10     | 3368 (23.3)        |

114

(continued)

115 **eTable 1. (continued)**

116 **C Patients Without ROSC at Hospital Arrival**

|          | <b>No. (%) of patients (n = 33 466)</b> |                        |                        |                        |                        |                        |                        | <b>P value</b> | <b>Total (n = 33 466)</b> |
|----------|-----------------------------------------|------------------------|------------------------|------------------------|------------------------|------------------------|------------------------|----------------|---------------------------|
|          | <b>2014 (n = 1718)</b>                  | <b>2015 (n = 4698)</b> | <b>2016 (n = 5182)</b> | <b>2017 (n = 5337)</b> | <b>2018 (n = 5598)</b> | <b>2019 (n = 5470)</b> | <b>2020 (n = 5463)</b> |                |                           |
| CPC ≤2   | 1 (0.1)                                 | 0 (0)                  | 4 (0.1)                | 5 (0.1)                | 7 (0.1)                | 4 (0.1)                | 2 (0.04)               | .57            | 23 (0.1)                  |
| CPC ≤3   | 2 (0.1)                                 | 6 (0.1)                | 7 (0.1)                | 11 (0.2)               | 16 (0.3)               | 9 (0.2)                | 6 (0.1)                | .74            | 57 (0.2)                  |
| Survival | 13 (0.8)                                | 24 (0.5)               | 36 (0.7)               | 31 (0.6)               | 34 (0.6)               | 29 (0.5)               | 25 (0.5)               | .21            | 192 (0.6)                 |
| ROSC     | 294 (17.1)                              | 836 (17.8)             | 943 (18.2)             | 945 (17.7)             | 948 (16.9)             | 929 (17.0)             | 749 (13.7)             | <.001          | 5644 (16.9)               |

117

118 **D Patients Who Were Candidates for TOR by The ALS-TOR Rule**

|          | <b>No. (%) of patients (n = 12 731)</b> |                        |                        |                        |                        |                        |                        | <b>P value</b> | <b>Total (n = 12 731)</b> |
|----------|-----------------------------------------|------------------------|------------------------|------------------------|------------------------|------------------------|------------------------|----------------|---------------------------|
|          | <b>2014 (n = 748)</b>                   | <b>2015 (n = 1863)</b> | <b>2016 (n = 1973)</b> | <b>2017 (n = 1899)</b> | <b>2018 (n = 2142)</b> | <b>2019 (n = 2059)</b> | <b>2020 (n = 2047)</b> |                |                           |
| CPC ≤2   | 0 (0)                                   | 0 (0)                  | 2 (0.1)                | 3 (0.2)                | 3 (0.1)                | 0 (0)                  | 0 (0)                  | .73            | 8 (0.1)                   |
| CPC ≤3   | 1 (0.1)                                 | 0 (0)                  | 2 (0.1)                | 4 (0.2)                | 5 (0.2)                | 1 (0.04)               | 1 (0.04)               | .99            | 14 (0.1)                  |
| Survival | 2 (0.3)                                 | 5 (0.3)                | 5 (0.3)                | 6 (0.3)                | 9 (0.4)                | 6 (0.3)                | 7 (0.3)                | .55            | 40 (0.3)                  |
| ROSC     | 94 (12.6)                               | 231 (12.4)             | 271 (13.7)             | 232 (12.2)             | 269 (12.6)             | 245 (11.9)             | 205 (10.0)             | .007           | 1547 (12.2)               |

119 Abbreviations: CPC, Cerebral Performance Category; ROSC, return of spontaneous circulation; TOR, termination of

120 resuscitation; ALS-TOR, advanced life support-termination of resuscitation.

**eFigure 1. Secular trends in the patient outcomes at 90 days**

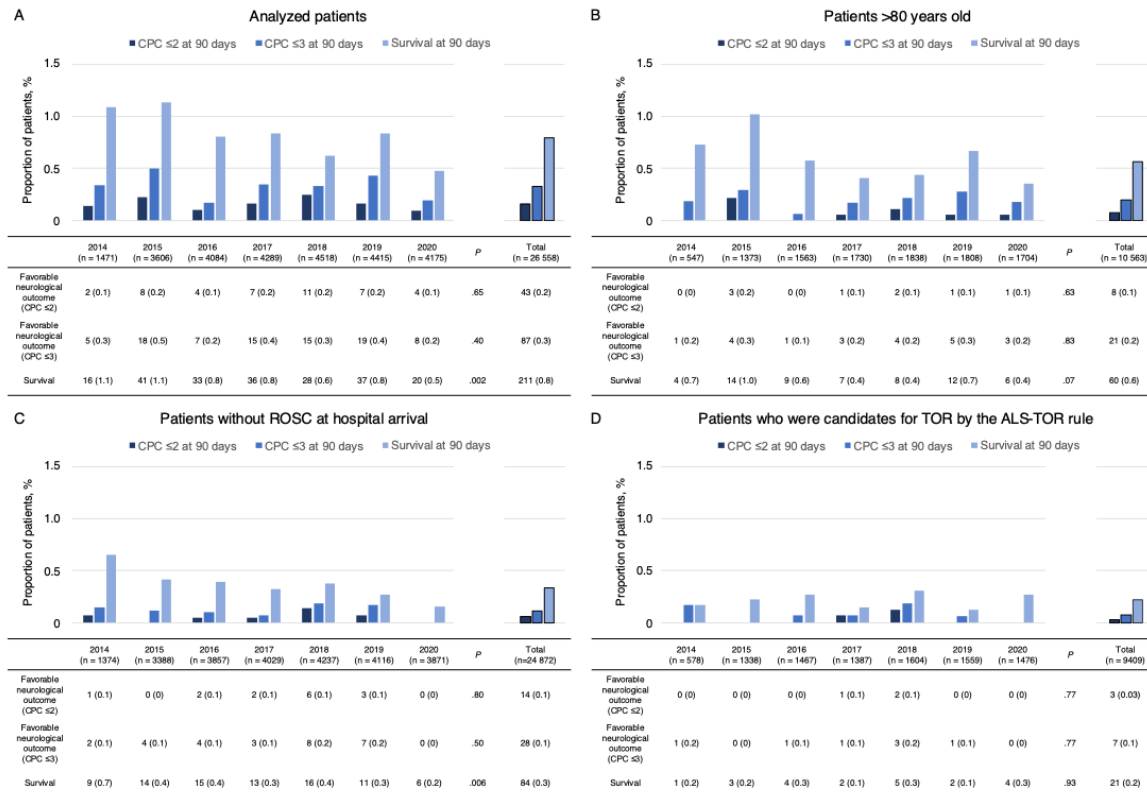

121

122 **eFigure 1. Secular Trends in the Patient Outcomes at 90 days**

123 A Secular trends in the proportion of patients who showed a favorable neurological outcome (CPC ≤2 and CPC ≤3) at 90  
 124 days and survived at 90 days among the analyzed patients.

125 B Secular trends in the patients aged >80 years old.

126 C Secular trends in the patients without ROSC at hospital arrival.

127 D Secular trends in the patients who were candidates for TOR by the ALS-TOR rule.

128 CPC indicates Cerebral Performance Category; ROSC, return of spontaneous circulation; TOR, termination-of-resuscitation;

129 ALS-TOR, advanced life support termination-of-resuscitation.



**Figure 2. Secular trends in the outcomes among patients with ROSC at any time**

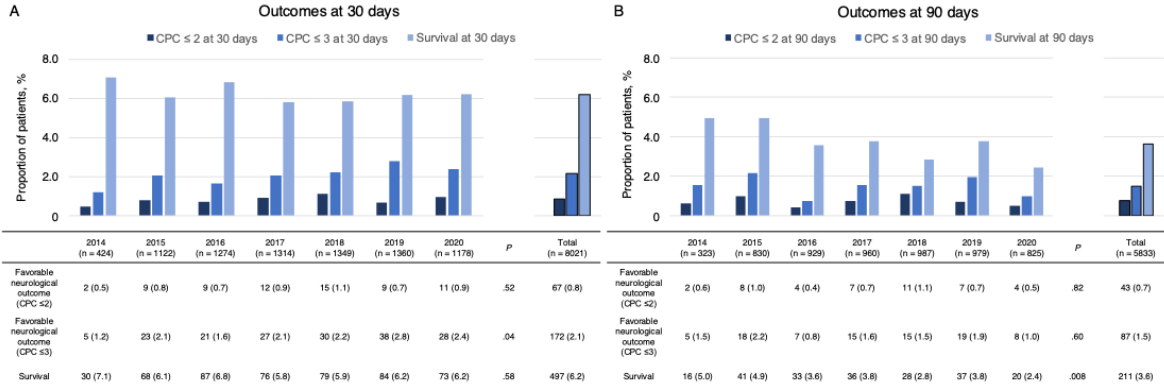

130

131 **eFigure 2. Secular Trends in the Outcomes Among Patients With ROSC at Any**  
 132 **Time**

133 A Secular trends in the proportion of patients who showed a favorable neurological outcome (CPC ≤2 and CPC ≤3) at 30  
 134 days and survived at 30 days among the patients who achieved ROSC at any time during the resuscitation process.

135 B Secular trends in the proportion of patients who showed a favorable neurological outcome (CPC ≤2 and CPC ≤3) at 90  
 136 days and survived at 90 days among the patients who achieved ROSC at any time during the resuscitation process.

137 ROSC indicates return of spontaneous circulation; CPC, Cerebral Performance Category.

138 **eTable 2.** Secular Trends in the Performance of Prehospital and In-Hospital  
 139 Advanced Life Support (ALS) Procedures in the Analyzed Patients

140 A Prehospital Procedure

|                    | No. (%) of patients (n = 35 843) |                 |                 |                 |                 |                 |                 | P value | Total (n = 35 843) |
|--------------------|----------------------------------|-----------------|-----------------|-----------------|-----------------|-----------------|-----------------|---------|--------------------|
|                    | 2014 (n = 1848)                  | 2015 (n = 4984) | 2016 (n = 5513) | 2017 (n = 5706) | 2018 (n = 5999) | 2019 (n = 5901) | 2020 (n = 5892) |         |                    |
| AAM                | 938 (50.8)                       | 2279 (45.7)     | 2815 (51.1)     | 3090 (54.2)     | 3224 (53.7)     | 3090 (52.4)     | 3216 (54.6)     | <.001   | 18 652 (52.0)      |
| IV catheterization | 724 (39.2)                       | 2015 (40.4)     | 2047 (37.1)     | 2483 (43.5)     | 2508 (41.8)     | 2488 (42.2)     | 2506 (42.5)     | <.001   | 14 771 (41.2)      |
| Epinephrine        | 454 (24.6)                       | 1159 (23.3)     | 1305 (23.7)     | 1526 (26.7)     | 1784 (29.7)     | 1909 (32.4)     | 1989 (33.8)     | <.001   | 10 126 (28.3)      |

141

142 B In-hospital Procedure

|                     | No. (%) of patients (n = 35 843) |                 |                 |                 |                 |                 |                 | P value | Total (n = 35 843) |
|---------------------|----------------------------------|-----------------|-----------------|-----------------|-----------------|-----------------|-----------------|---------|--------------------|
|                     | 2014 (n = 1848)                  | 2015 (n = 4984) | 2016 (n = 5513) | 2017 (n = 5706) | 2018 (n = 5999) | 2019 (n = 5901) | 2020 (n = 5892) |         |                    |
| Epinephrine         | 1572 (85.1)                      | 4153 (83.3)     | 4687 (85.0)     | 4854 (85.1)     | 4939 (82.3)     | 4798 (81.3)     | 4516 (76.6)     | <.001   | 29 519 (82.4)      |
| Tracheal intubation | 1215 (65.7)                      | 3204 (64.3)     | 3638 (66.0)     | 3542 (62.1)     | 3663 (61.1)     | 3702 (62.7)     | 3135 (53.2)     | <.001   | 22 099 (61.7)      |
| TTM                 | 35 (1.9)                         | 88 (1.8)        | 89 (1.6)        | 88 (1.5)        | 85 (1.4)        | 79 (1.3)        | 61 (1.0)        | <.001   | 525 (1.5)          |

143

Abbreviations: AAM, advanced airway management; IV, intravenous; TTM, targeted temperature management.

144 **eTable 3.** Characteristics of Patients With OHCA and an Initial Rhythm of Asystole  
 145 Who Received Prehospital AAM and Were at Risk of Receiving AAM in the Time-  
 146 Dependent Propensity Score-Matched Cohort<sup>a</sup>

|                                    | No. (%) of patients        |                        | Standardized difference |
|------------------------------------|----------------------------|------------------------|-------------------------|
|                                    | Control group (n = 18 135) | AAM group (n = 18 135) |                         |
| Age, median (IQR), y               | 76 (62-85)                 | 78 (67-86)             | 0.145                   |
| Sex                                |                            |                        |                         |
| Male                               | 10 516 (58.0)              | 10 426 (57.5)          | 0.010                   |
| Female                             | 7619 (42.0)                | 7709 (42.5)            |                         |
| External cause of arrest           | 2188 (12.1)                | 1391 (7.7)             | 0.148                   |
| Witness category                   |                            |                        |                         |
| Family                             | 2609 (14.4)                | 3007 (16.6)            | 0.048                   |
| Friend                             | 234 (1.3)                  | 278 (1.5)              |                         |
| Colleague                          | 124 (0.7)                  | 108 (0.6)              |                         |
| Passer-by                          | 445 (2.5)                  | 213 (1.2)              |                         |
| Others                             | 1719 (9.5)                 | 1552 (8.6)             |                         |
| No witness                         | 13 004 (71.7)              | 12 977 (71.6)          |                         |
| Category of bystander CPR          |                            |                        |                         |
| Chest compression only             | 7486 (41.3)                | 7641 (42.1)            | 0.052                   |
| Chest compression with ventilation | 709 (3.9)                  | 906 (5.0)              |                         |
| No bystander CPR                   | 9940 (54.8)                | 9588 (52.9)            |                         |
| Year of occurrence                 |                            |                        |                         |
| 2014                               | 913 (5.0)                  | 930 (5.1)              | 0.035                   |
| 2015                               | 2660 (14.7)                | 2265 (12.5)            |                         |
| 2016                               | 2776 (15.3)                | 2781 (15.3)            |                         |
| 2017                               | 2873 (15.8)                | 3049 (16.8)            |                         |
| 2018                               | 3121 (17.2)                | 3191 (17.6)            |                         |
| 2019                               | 3022 (16.7)                | 3053 (16.8)            |                         |
| 2020                               | 2770 (15.3)                | 2866 (15.8)            |                         |

147

(continued)

148 **eTable 3. (continued)**

|                                               | No. (%) of patients           |                           | Standardized difference |
|-----------------------------------------------|-------------------------------|---------------------------|-------------------------|
|                                               | Control group<br>(n = 18 135) | AAM group<br>(n = 18 135) |                         |
| Day of occurrence                             |                               |                           |                         |
| Weekday                                       | 12 052 (66.5)                 | 11 986 (66.1)             | 0.008                   |
| Weekend                                       | 6083 (33.5)                   | 6149 (33.9)               |                         |
| Time of occurrence                            |                               |                           |                         |
| Daytime                                       | 7305 (40.3)                   | 7226 (39.8)               | 0.009                   |
| Nighttime                                     | 10 830 (59.7)                 | 10 909 (60.2)             |                         |
| Prehospital involvement of physician          | 1533 (8.5)                    | 1057 (5.8)                | 0.102                   |
| Response time, median (IQR), min <sup>b</sup> | 9 (7-11)                      | 9 (7-10)                  | 0.043                   |

149 Abbreviations: AAM, advanced airway management; CPR, cardiopulmonary resuscitation.

150 <sup>a</sup> Continuous variables were expressed as medians (interquartile range [IQR]: 25-75), and categorical variables were  
 151 expressed as proportions (%).

152 <sup>b</sup> Time from call to contact with the patient.

153 **eTable 4.** Characteristics of Patients With OHCA and an Initial Rhythm of Asystole  
 154 Who Received Prehospital Epinephrine Administration and Were at Risk of  
 155 Receiving Prehospital Epinephrine Administration in the Time-Dependent  
 156 Propensity Score-Matched Cohort<sup>a</sup>

|                                    | No. (%) of patients      |                              | Standardized difference |
|------------------------------------|--------------------------|------------------------------|-------------------------|
|                                    | Control group (n = 9714) | Epinephrine group (n = 9714) |                         |
| Age, median (IQR), y               | 77 (64-85)               | 78 (67-86)                   | 0.118                   |
| Sex                                |                          |                              |                         |
| Male                               | 5575 (57.4)              | 5772 (59.4)                  | 0.041                   |
| Female                             | 4139 (42.6)              | 3942 (40.6)                  |                         |
| External cause of arrest           | 1098 (11.3)              | 714 (7.4)                    | 0.136                   |
| Witness category                   |                          |                              |                         |
| Family                             | 1316 (13.5)              | 2023 (20.8)                  | 0.095                   |
| Friend                             | 129 (1.3)                | 149 (1.5)                    |                         |
| Colleague                          | 74 (0.8)                 | 83 (0.9)                     |                         |
| Passer-by                          | 204 (2.1)                | 137 (1.4)                    |                         |
| Others                             | 828 (8.5)                | 1011 (10.4)                  |                         |
| No witness                         | 7163 (73.7)              | 6311 (65.0)                  |                         |
| Category of bystander CPR          |                          |                              |                         |
| Chest compression only             | 4030 (41.5)              | 4291 (44.2)                  | 0.064                   |
| Chest compression with ventilation | 431 (4.4)                | 484 (5.0)                    |                         |
| No bystander CPR                   | 5253 (54.1)              | 4939 (50.8)                  |                         |
| Year of occurrence                 |                          |                              |                         |
| 2014                               | 499 (5.1)                | 447 (4.6)                    | 0.094                   |
| 2015                               | 1290 (13.3)              | 1150 (11.8)                  |                         |
| 2016                               | 1483 (15.3)              | 1274 (13.1)                  |                         |
| 2017                               | 1531 (15.8)              | 1486 (15.3)                  |                         |
| 2018                               | 1673 (17.2)              | 1754 (18.1)                  |                         |
| 2019                               | 1691 (17.4)              | 1868 (19.2)                  |                         |
| 2020                               | 1547 (15.9)              | 1735 (17.9)                  |                         |

157

(continued)

158



160 **eTable 4. (continued)**

|                                               | No. (%) of patients         |                                 | Standardized difference |
|-----------------------------------------------|-----------------------------|---------------------------------|-------------------------|
|                                               | Control group<br>(n = 9714) | Epinephrine group<br>(n = 9714) |                         |
| Day of occurrence                             |                             |                                 |                         |
| Weekday                                       | 6467 (66.6)                 | 6479 (66.7)                     | 0.003                   |
| Weekend                                       | 3247 (33.4)                 | 3235 (33.3)                     |                         |
| Time of occurrence                            |                             |                                 |                         |
| Daytime                                       | 3859 (39.7)                 | 3994 (41.1)                     | 0.028                   |
| Nighttime                                     | 5855 (60.3)                 | 5720 (58.9)                     |                         |
| Prehospital involvement of physician          | 739 (7.6)                   | 687 (7.1)                       | 0.021                   |
| Response time, median (IQR), min <sup>b</sup> | 8 (7-10)                    | 9 (7-11)                        | <.001                   |

161 Abbreviations: CPR, cardiopulmonary resuscitation.

162 <sup>a</sup> Continuous variables were expressed as medians (interquartile range [IQR]: 25-75), and categorical variables were  
 163 expressed as proportions (%).

164 <sup>b</sup> Time from call to contact with the patient.

165 **eTable 5.** Association Between Prehospital ALS Procedures and Patient Outcomes  
 166 at 90 Days

| Outcome  | AAM                                      |                                  |                     | Epinephrine                              |                               |                     |
|----------|------------------------------------------|----------------------------------|---------------------|------------------------------------------|-------------------------------|---------------------|
|          | Patients with outcome, No./total No. (%) |                                  |                     | Patients with outcome, No./total No. (%) |                               |                     |
|          | Control group                            | AAM group                        | OR (95% CI)         | Control group                            | Epinephrine group             | OR (95% CI)         |
| CPC ≤2   | 17/18 135 <sup>a</sup><br>(0.1)          | 20/18 135 <sup>a</sup><br>(0.1)  | 1.67<br>(0.73-3.81) | 14/9714 <sup>b</sup><br>(0.1)            | 7/9714 <sup>b</sup><br>(0.1)  | 0.60<br>(0.22-1.65) |
| CPC ≤3   | 41/18 135 <sup>a</sup><br>(0.2)          | 44/18 135 <sup>a</sup><br>(0.2)  | 1.29<br>(0.78-2.11) | 22/9714 <sup>b</sup><br>(0.2)            | 25/9714 <sup>b</sup><br>(0.3) | 1.13<br>(0.57-2.27) |
| Survival | 99/18 135 <sup>a</sup><br>(0.5)          | 110/18 135 <sup>a</sup><br>(0.6) | 1.17<br>(0.85-1.61) | 51/9714 <sup>b</sup><br>(0.5)            | 80/9714 <sup>b</sup><br>(0.8) | 1.54<br>(1.01-2.36) |

167 <sup>a</sup>There were 9079 missing data for outcome at 90 days in the risk-set matched cohort.

168 <sup>b</sup>There were 5131 missing data for outcome at 90 days in the risk-set matched cohort.

169 Abbreviations: ALS, advanced life support; AAM, advanced airway management; OR, odds ratio; CPC, Cerebral

170 Performance Category.

171



172 **eTable 6.** Time Spent on CPR Procedures Until ROSC

|             | <b>Hour (min)</b>                         |                                                                                   |                                                              |                                                                                   |
|-------------|-------------------------------------------|-----------------------------------------------------------------------------------|--------------------------------------------------------------|-----------------------------------------------------------------------------------|
|             | <b>Analyzed patients<br/>(n = 35 843)</b> |                                                                                   | <b>Patients who were candidates<br/>for TOR (n = 12 731)</b> |                                                                                   |
|             | <b>Total time</b>                         | <b>Time incurred<br/>to obtain one<br/>patient with<br/>CPC ≤2 at 30<br/>days</b> | <b>Total time</b>                                            | <b>Time incurred<br/>to obtain one<br/>patient with<br/>CPC ≤2 at 30<br/>days</b> |
| Prehospital | 20 928 <sup>a</sup><br>(1 255 685)        | 312 <sup>a</sup><br>(18 742)                                                      | 7568 <sup>d</sup><br>(454 089)                               | 946 <sup>d</sup><br>(56 761)                                                      |
| In-hospital | 14 506 <sup>b</sup><br>(870 348)          | 217 <sup>b</sup><br>(12 990)                                                      | 5271 <sup>e</sup><br>(316 266)                               | 659 <sup>e</sup><br>(39 533)                                                      |
| Total       | 35 434 <sup>c</sup><br>(2 126 033)        | 529 <sup>c</sup><br>(31 732)                                                      | 12 839 <sup>f</sup><br>(770 355)                             | 1605 <sup>f</sup><br>(96 294)                                                     |

173 <sup>a</sup>There were 5 missing data.

174 <sup>b</sup>There were 828 missing data.

175 <sup>c</sup>There was 1 missing data.

176 <sup>d</sup>There was 1 missing data.

177 <sup>e</sup>There were 293 missing data.

178 <sup>f</sup>There was 1 missing data.

179 Abbreviations: CPR, cardiopulmonary resuscitation; ROSC, return of spontaneous circulation; TOR, termination-of-

180 resuscitation; CPC, Cerebral Performance Category.

181 **eReferences.**

- 182 **1.** Kitamura T, Iwami T, Atsumi T, et al. The profile of Japanese Association for Acute  
183 Medicine - out-of-hospital cardiac arrest registry in 2014-2015. *Acute Med Surg.*  
184 2018;5(3):249-258. doi:10.1002/ams2.340
- 185 **2.** Jacobs I, Nadkarni V, Bahr J, et al. Cardiac arrest and cardiopulmonary resuscitation  
186 outcome reports: update and simplification of the Utstein templates for resuscitation  
187 registries. A statement for healthcare professionals from a task force of the  
188 international liaison committee on resuscitation (American Heart Association,  
189 European Resuscitation Council, Australian Resuscitation Council, New Zealand  
190 Resuscitation Council, Heart and Stroke Foundation of Canada, InterAmerican  
191 Heart Foundation, Resuscitation Council of Southern Africa). *Resuscitation.*  
192 2004;63(3):233-249. doi:10.1016/j.resuscitation.2004.09.008
- 193 **3.** Perkins GD, Jacobs IG, Nadkarni VM, et al. Cardiac arrest and cardiopulmonary  
194 resuscitation outcome reports: update of the Utstein Resuscitation Registry  
195 Templates for Out-of-Hospital Cardiac Arrest: a statement for healthcare  
196 professionals from a task force of the International Liaison Committee on  
197 Resuscitation (American Heart Association, European Resuscitation Council,  
198 Australian and New Zealand Council on Resuscitation, Heart and Stroke  
199 Foundation of Canada, InterAmerican Heart Foundation, Resuscitation Council of  
200 Southern Africa, Resuscitation Council of Asia); and the American Heart  
201 Association Emergency Cardiovascular Care Committee and the Council on  
202 Cardiopulmonary, Critical Care, Perioperative and Resuscitation. *Circulation.*  
203 2015;132(13):1286-1300. doi:10.1161/CIR.000000000000144
- 204 **4.** Japan Resuscitation Council. *JRC Resuscitation Guidelines 2020*. Bunkyo-ku,  
205 Tokyo: Igaku Shoin; 2021.

- 206 **5.** Kajino K, Kitamura T, Iwami T, et al. Current termination of resuscitation (TOR)  
207 guidelines predict neurologically favorable outcome in Japan. *Resuscitation*.  
208 2013;84(1):54-59. doi:10.1016/j.resuscitation.2012.05.027
- 209 **6.** Morrison LJ, Verbeek PR, Vermeulen MJ, et al. Derivation and evaluation of a  
210 termination of resuscitation clinical prediction rule for advanced life support  
211 providers. *Resuscitation*. 2007;74(2):266-275.  
212 doi:10.1016/j.resuscitation.2007.01.009
- 213 **7.** Izawa J, Komukai S, Gibo K, et al. Pre-hospital advanced airway management for  
214 adults with out-of-hospital cardiac arrest: nationwide cohort study. *BMJ*.  
215 2019;364:l430. doi:10.1136/bmj.l430
- 216 **8.** Matsuyama T, Komukai S, Izawa J, et al. Pre-Hospital Administration of  
217 Epinephrine in Pediatric Patients With Out-of-Hospital Cardiac Arrest. *J Am Coll*  
218 *Cardiol*. 2020;75(2):194-204. doi:10.1016/j.jacc.2019.10.052
- 219 **9.** Okubo M, Komukai S, Izawa J, et al. Prehospital advanced airway management for  
220 paediatric patients with out-of-hospital cardiac arrest: A nationwide cohort study.  
221 *Resuscitation*. 2019;145:175-184. doi:10.1016/j.resuscitation.2019.09.007
- 222 **10.** Matsuyama T, Komukai S, Izawa J, et al. Epinephrine administration for adult out-  
223 of-hospital cardiac arrest patients with refractory shockable rhythm: time-dependent  
224 propensity score-sequential matching analysis from a nationwide population-based  
225 registry. *Eur Heart J Cardiovasc Pharmacother*. 2022;8(3):263-271.  
226 doi:10.1093/ehjcvp/pvab013
- 227 **11.** Beyersmann J, Schumacher M. Time-dependent covariates in the proportional  
228 subdistribution hazards model for competing risks. *Biostatistics*. 2008;9(4):765-776.  
229 doi:10.1093/biostatistics/kxn009
- 230 **12.** Lo CYZ, Fook-Chong S, Shahidah N, et al. Does witness type affect the chance of  
231 receiving bystander CPR in out-of-hospital cardiac arrest? *Resuscitation*.  
232 2023;189:109873. doi:10.1016/j.resuscitation.2023.109873

- 233 **13.** Lu B. Propensity score matching with time-dependent covariates. *Biometrics*.  
234 2005;61(3):721-728. doi:10.1111/j.1541-0420.2005.00356.x
- 235 **14.** Li YP, Propert K.J., Rosenbaum P.R. Balanced Risk Set Matching. *J Am Stat Assoc*.  
236 2001;96(455):870-882
- 237 **15.** Stuart EA. Matching methods for causal inference: A review and a look forward.  
238 *Stat Sci*. 2010;25(1):1-21. doi:10.1214/09-STS313
- 239 **16.** Austin PC. An Introduction to Propensity Score Methods for Reducing the Effects  
240 of Confounding in Observational Studies. *Multivariate Behav Res*. 2011;46(3):399-  
241 424. doi:10.1080/00273171.2011.568786
- 242 **17.** Liu Y, Yo CH, Hu JR, et al. Sepsis increases the risk of in-hospital cardiac arrest: a  
243 population-based analysis. *Intern Emerg Med*. 2023. doi:10.1007/s11739-023-  
244 03475-6
- 245
- 246
