# Supplementary material for: Resuscitation Attempt and Outcomes in Patients With Asystole Out-of-Hospital Cardiac Arrest
Source: PubMed Central journal article supplement (PMC11574695; doi:10.1001/jamanetworkopen.2024.45543), 2024-11-18
Supplement: jamanetwopen-e2445543-s002.pdf [file jamanetwopen-e2445543-s002.pdf]

## Data Sharing Statement

Ishii. Resuscitation Attempt and Outcomes in Patients With Asystole Out-of-Hospital Cardiac Arrest. *JAMA Netw Open*. Published November 18, 2024.  
doi:10.1001/jamanetworkopen.2024.45543

### Data

**Data available:** No
